# Supplementary material
Source: PubMed Central journal article supplement (PMC7007807)

### Supplemental Digital Content 3. Figure

HIV viral load distribution with subsequent antiretroviral therapy following treatment interruption stratified by duration of treatment interruption.

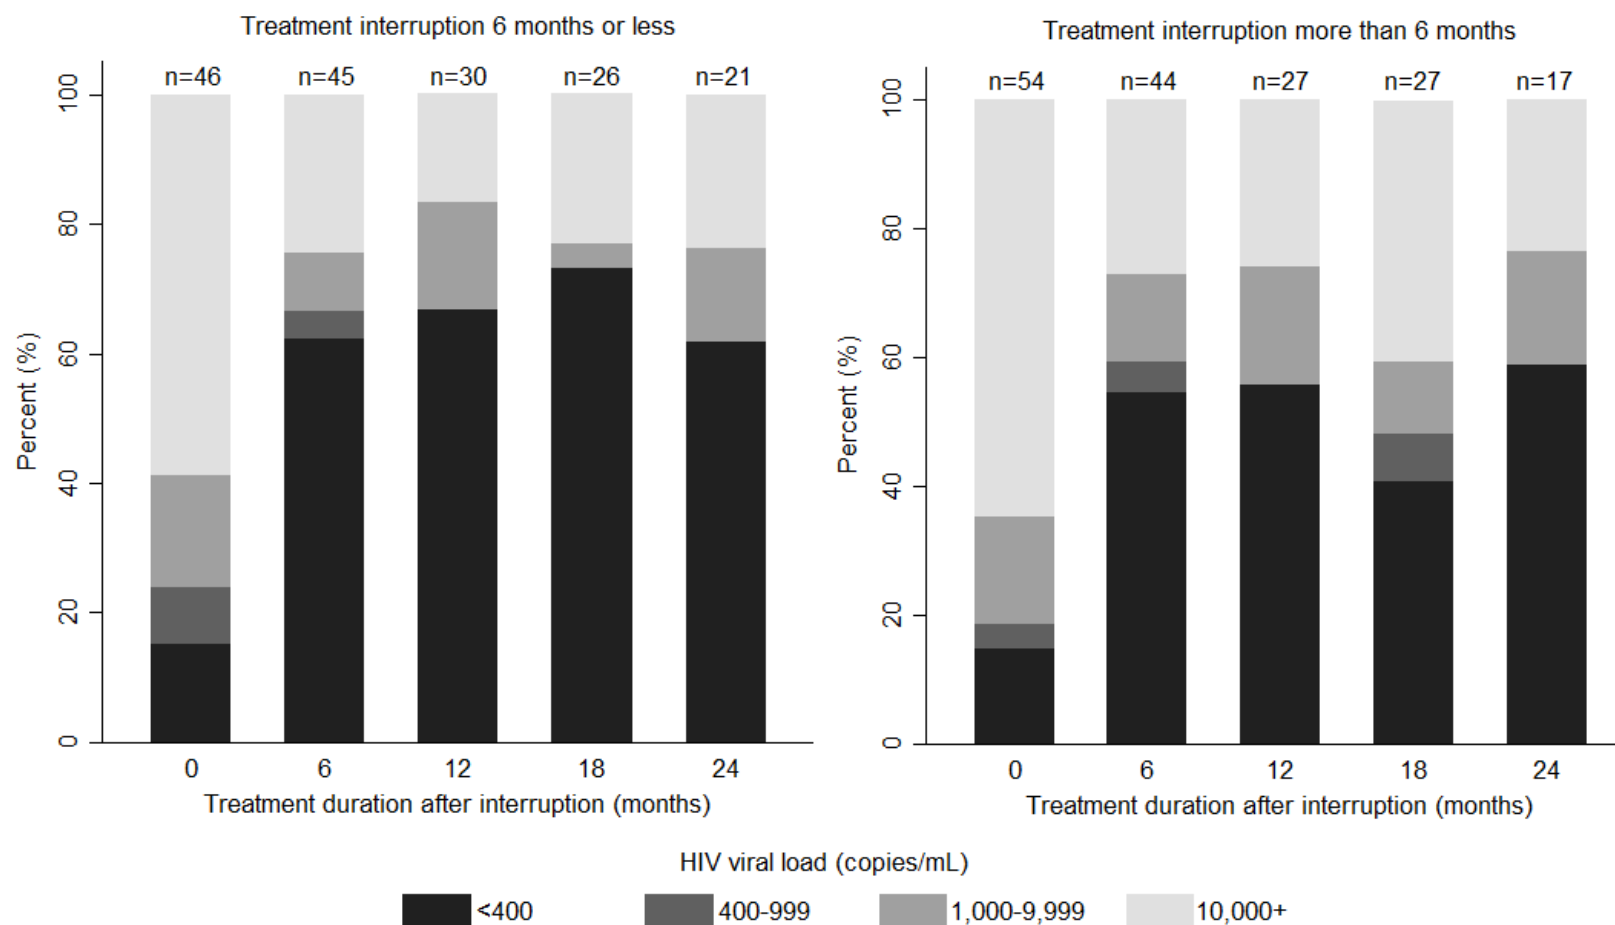

Supplement: NIHMS1067543-supplement-Supplemental_3.pdf [file NIHMS1067543-supplement-Supplemental_3.pdf]
