# Supplementary material
Source: PubMed Central journal article supplement (PMC7007807)

## Supplemental Digital Content 1. Figure

Median CD4 count trend with subsequent antiretroviral therapy following (a) monotherapy and (b) treatment interruption stratified by duration of monotherapy or treatment interruption.

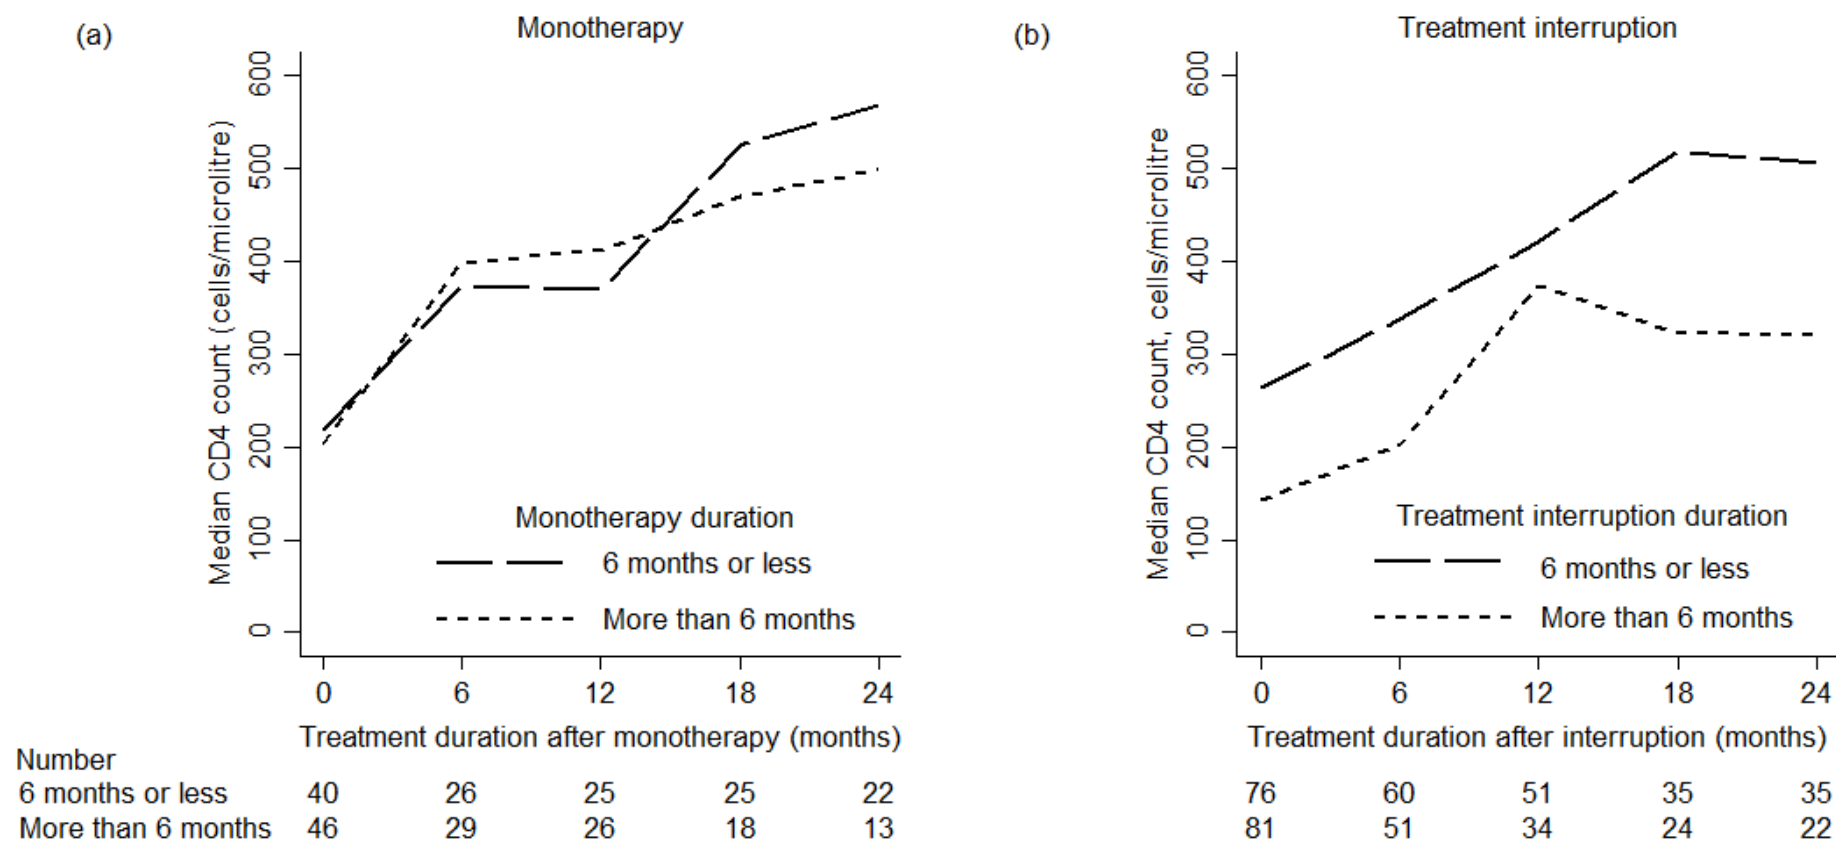

Supplement: NIHMS1067543-supplement-Supplemental_Figure_1.pdf [file NIHMS1067543-supplement-Supplemental_Figure_1.pdf]
