# Supplementary material
Source: PubMed Central journal article supplement (PMC7007807)

## Supplemental Digital Content 2. Figure

HIV viral load distribution with subsequent antiretroviral therapy following monotherapy stratified by duration of monotherapy.

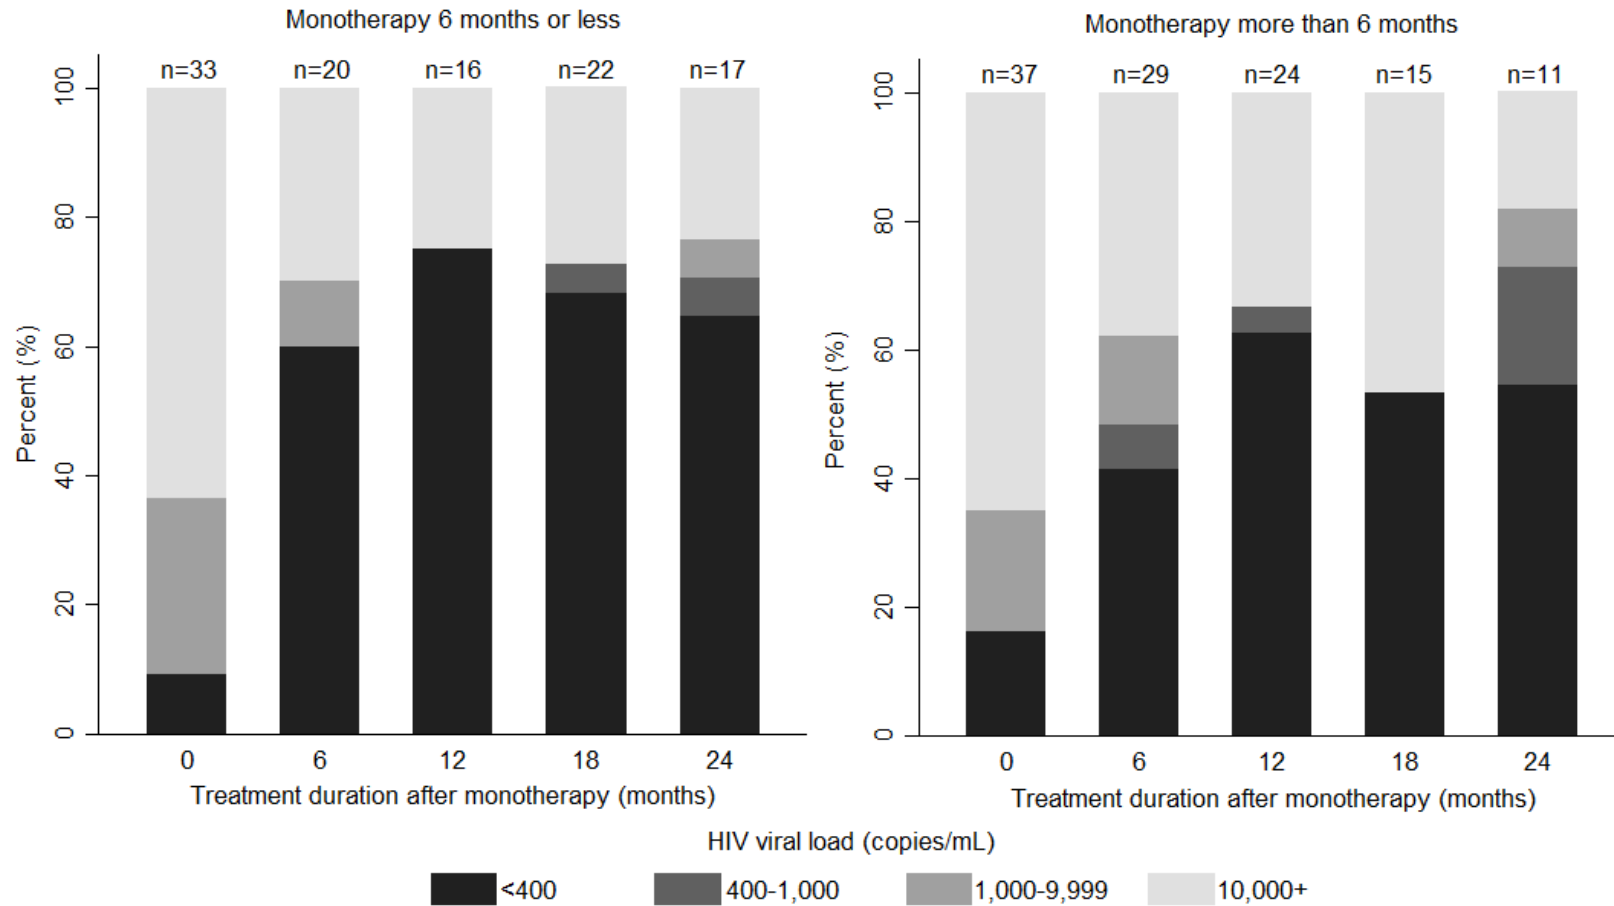

Supplement: NIHMS1067543-supplement-Supplemental_Figure_2.pdf [file NIHMS1067543-supplement-Supplemental_Figure_2.pdf]
